# Supplementary material for: Use of In Vitro Assays to Assess Immunogenicity Risk of Antibody-Based Biotherapeutics
Source: PubMed Central journal article supplement (PMC4975389; doi:10.1371/journal.pone.0159328), 2016-08-05
Supplement: pone.0159328.s002.pdf [file pone.0159328.s002.pdf]

**A Early (20 hour) Response**

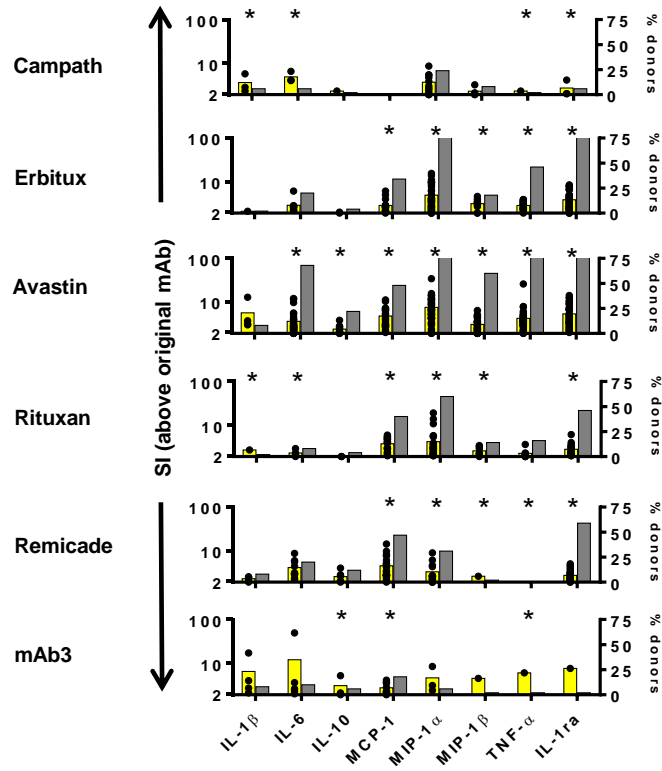

**B Late-stage (7 day) Response**

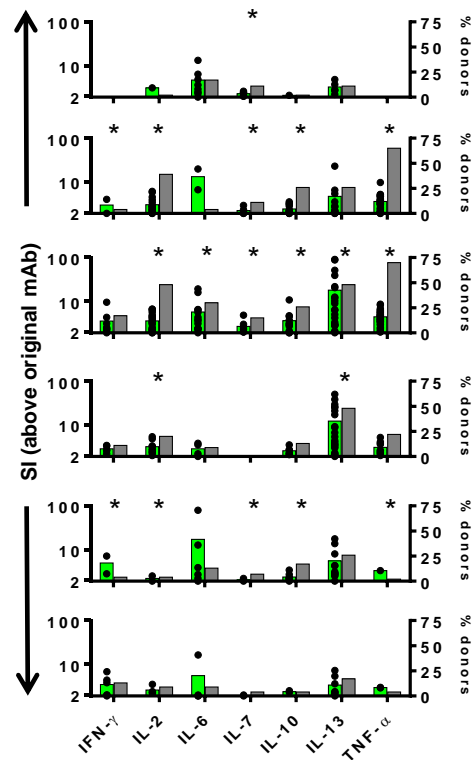

**S2 Fig**
