# Supplementary material for: Use of In Vitro Assays to Assess Immunogenicity Risk of Antibody-Based Biotherapeutics
Source: PubMed Central journal article supplement (PMC4975389; doi:10.1371/journal.pone.0159328), 2016-08-05
Supplement: pone.0159328.s003.pdf [file pone.0159328.s003.pdf]

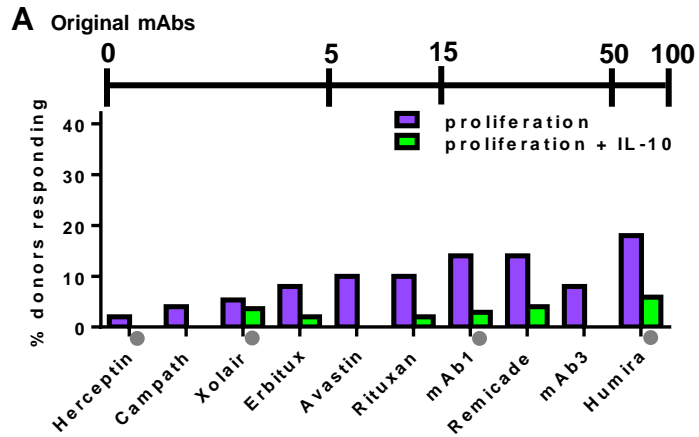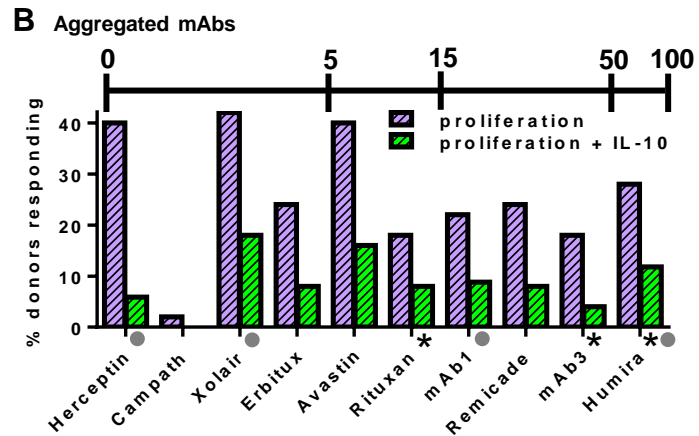

**S3 Fig**
